# Supplementary material for: Structural properties of the inner coordination sphere of indium chloride complexes in organic and aqueous solutions
Source: Royal Society of Chemistry journal article supplement (doi:10.1039/c3dt52474d), 2013-10-31
Supplement: c3dt52474d.pdf [file c3dt52474d.pdf]

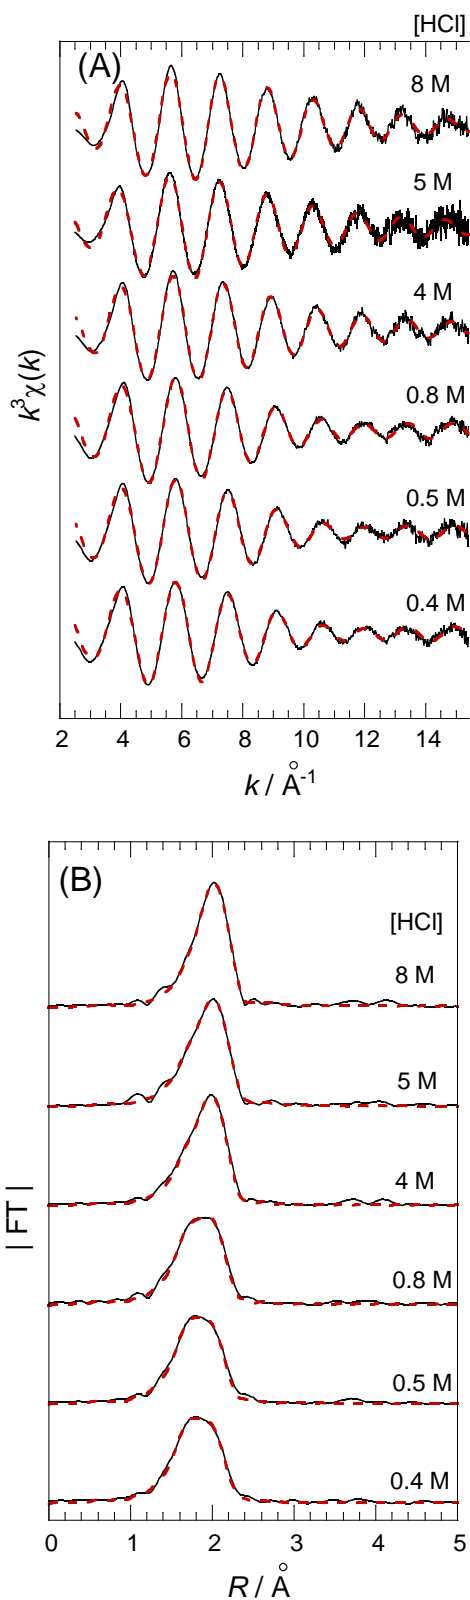

**Fig. S1** (A) In K-edge  $k^3$ -weighted EXAFS spectra and (B) the corresponding FTs for the In<sup>3+</sup> ion in 0.4 M-8 M HCl solutions. The phase shifts are not corrected. Experimental data (solid line), theoretical fit (dashed line).

**Table S1. In K-edge EXAFS Structural Parameters for In<sup>3+</sup> in HCl solutions**

| [HCl] |       | CN                  | <i>r</i> (Å) | $\sigma^2$ (Å <sup>2</sup> ) | $\Delta E$ (eV) | R-factor |
|-------|-------|---------------------|--------------|------------------------------|-----------------|----------|
| 0.4 M | In-O  | 2.2(2) <sup>a</sup> | 2.14(1)      | 0.0036 <sup>c</sup>          | 6.0             | 4.3      |
|       | In-Cl | 3.8(2) <sup>b</sup> | 2.403(7)     | 0.0067 <sup>c</sup>          |                 |          |
| 0.5 M | In-Cl | 2.1(2) <sup>a</sup> | 2.14(1)      | 0.0036 <sup>c</sup>          | 6.4             | 4.9      |
|       | In-Cl | 3.9(2) <sup>b</sup> | 2.402(8)     | 0.0067 <sup>c</sup>          |                 |          |
| 0.8 M | In-O  | 1.9(2) <sup>a</sup> | 2.14(1)      | 0.0036 <sup>c</sup>          | 7.3             | 5.0      |
|       | In-Cl | 4.1(2) <sup>b</sup> | 2.411(8)     | 0.0067 <sup>c</sup>          |                 |          |
| 4 M   | In-O  | 0.9(2) <sup>a</sup> | 2.15(2)      | 0.0036 <sup>c</sup>          | 7.1             | 3.7      |
|       | In-Cl | 5.1(2) <sup>b</sup> | 2.431(5)     | 0.0067 <sup>c</sup>          |                 |          |
| 5 M   | In-O  | 0.6(3) <sup>a</sup> | 2.16(5)      | 0.0036 <sup>c</sup>          | 6.6             | 9.0      |
|       | In-Cl | 5.4(3) <sup>b</sup> | 2.451(9)     | 0.0067 <sup>c</sup>          |                 |          |
| 8 M   | In-O  | 0.2(2) <sup>a</sup> | 2.16(6)      | 0.0036 <sup>c</sup>          | 8.3             | 4.4      |
|       | In-Cl | 5.8(2) <sup>b</sup> | 2.460(5)     | 0.0067 <sup>c</sup>          |                 |          |

[In<sup>3+</sup>]: 0.1 M. <sup>a, b</sup> set as sum equal to 6; <sup>c</sup> fixed parameter.  $S_0^2$  was fixed at 0.95. Estimated errors in parentheses.

The *k*-range for the Fourier transformation: 2.5-15.5 Å<sup>-1</sup>; the curve-fitting *R*-range: 1-3 Å.

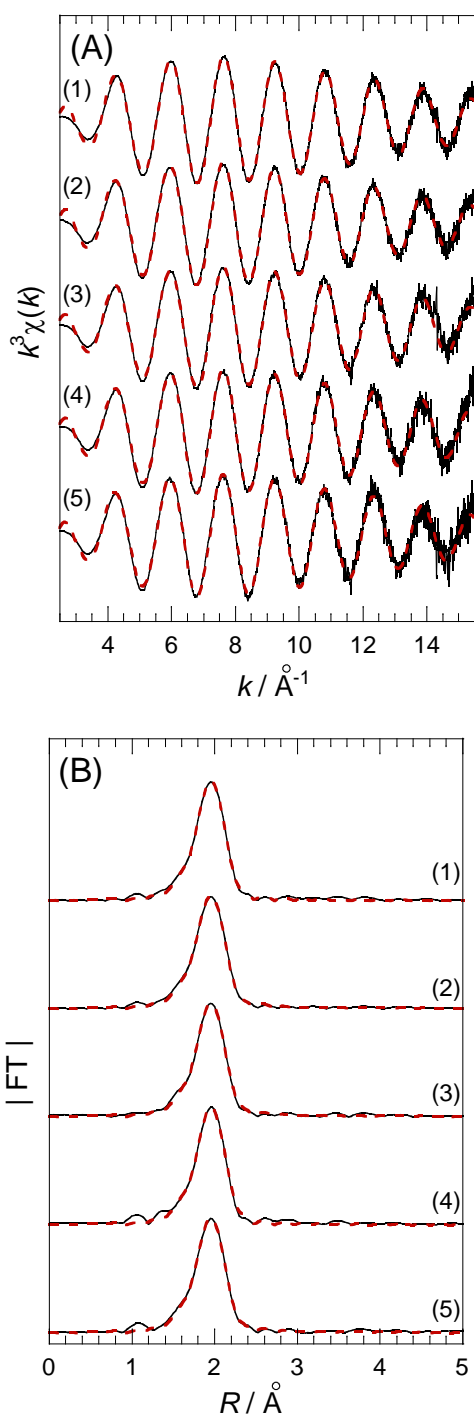

**Fig. S2** (A) In K-edge  $k^3$ -weighted EXAFS spectra and (B) the corresponding FTs for the extracted complexes. .  
The extracted complex 1: DD—1 M HCl 2: NB—1 M HCl, 3: DD—5 M HCl, 4: NB—5 M HCl and 5: NB—10 M HCl. The phase shifts are not corrected. Experimental data (solid line), theoretical fit (dashed line).
